# Supplementary material for: Tumor-Infiltrating Regulatory T-cell Accumulation in the Tumor Microenvironment Is Mediated by IL33/ST2 Signaling
Source: Oxford University Press journal article supplement (doi:10.1158/2326-6066.cir-19-0828), 2020-09-02
Supplement: 23266066cir190828-sup-231169_2_table_6496781_qf00hb.xlsx [file 23266066cir190828-sup-231169_2_table_6496781_qf00hb.xlsx]

## Sheet: Suppression
Foxf1
Il13ra2
Rabgef1
Cd300a
Abr
Bcr
Ada
Adora1
Il33
Il4ra
Jak3
Tnfsf4
Nmi
Ubqln1
Il1r2
Il1rl1
Havcr2
Itch
Btla
Cblb
Tnfrsf14
Cd96
Fcmr
Cd83
Foxp3
Scgb1a1
Ndfip1
Cd24a
Irg1
Lyn
Nod2
Elf1
Ptpn6
Lgals3
Prnp
Ptpn2
Ptprj
Thy1
Dusp22
Pawr
Btn2a2
Ubash3a
Btnl2
Rc3h1
Clec4g
Tnfaip3
Cd276
Pdcd1
Fcgr2b
Gpx1
Gpx2
Il12b
Psmb4
Psma1
Nlrp6
Gpr17
Prdm1
Casp3
Cdkn2a
Inpp5d
Tnfrsf13b
Tnfrsf21
Pkn1
Stap1
Cd44
Lgals9
Vsir
Lpxn
Plcl2
Fcrl5
Gstp1
Nr1h4
Erbb2ip
Adar
Nlrc5
Erbb2
Ihh
Alox15
Samsn1
Fbxo7
Btk
Epha2
Nfkb1
Slc11a1
Pparg
Ceacam1
Ndrg2
Il7r
Ppp3cb
Ptprc
Bcl2a1a
Hsh2d
Slc39a10
Irs2
Bcl6
Hlx
Irf1
Zfp35
Socs5
Tnfsf18
Il4
Dhx58
Nlrx1
Zbtb46
Gpr68
Sez6
Fat3
Rhbdd3
Gabpa
Cib1
Sox9
Trib1
Ptpn22
Ssc5d
Adora2a
Lag3
Slc37a4
Acp5
Chrna7
Adipoq
Apoe
Socs3
Ctla2a
Fem1a
Hgf
Ier3
Il10
Il2
Il2ra
Isl1
Krt1
Smad3
Nov
Ptger4
Tff2
Tnfrsf1b
Pglyrp1
Tyro3
Nr1h3
Zfp36
Ets1
Nt5e
Aoah
Il22
Pbk
Fam132a
Wfdc1
Tnfaip8l2
Uaca
Siglece
Hamp
Smpdl3b
Sharpin
Ffar4
Ash1l
Metrnl
Il22ra2
Tgfb1
Tlr4
Tlr2
Tusc2
Nckap1l
Foxj1
Nfkbid
Ido1
Lrrc32
Gata2
Thoc5
Prg4
Ccr7
Cd74
Mif
Ccr5
Ccl5
Cul4a
D1Ertd622e
Cuedc2
Zc3h12a
Cd37
Tspan32
Dtx1
Prdx2
Nrarp
Cyld
Flt3
Trim30a
Il1f5
Irak3
Tlr9
Vimp
Arrb2
Nlrc3
Bcl2
Epo
Clec5a
Fcer1g
Il3
Kitl
Stat5a
Pml
Twist2
Dll1
Hmgb3
Hoxa9
Hoxb8
Meis1
Meis2
Nfkbia
Gpr171
Rbm15
Zbtb16
Itpkb
Gbp4
Mertk
Axl
Epx
Slamf1
Id2
Sfrp1
Sh2d1b1
Klrb1b
Sh2d1b2
Stat1
Rab7b
Cd200
Adgrf5
Cd84
Tnfrsf9
Fadd
Tsc22d3
Gpam
Tnfrsf4
Cyp19a1
Cit
Ppp3ca
Tlx2
Ywhah
Nfatc4
Rapgef2
Peli3
Gata3
Pglyrp2
Il20rb
Pglyrp3
Pglyrp4
Spi1
2018-03-08
Nfx1
Srgn
Lgr4
Pla2g2d
Spn
Socs6
Peli1
Pag1
Vtcn1
Skint2
Tigit
Tmem176b
Tmem176a
Vsig4
Gpr18
Syt11
Bank1
Ccr1
Drd2
Trafd1
Plcb1
Cebpb
Dlg1
Mad1l1
Shh
Slfn1
Pla2g2f
2018-03-07
Pdcd1lg2
Cd274
Zc3h12d
Pde5a
Atg5
Cnn2
Atg3
Atg7
Ccr2
Tia1
Rnf128
Asap1
Fstl4
Cmklr1
Irf3
Zfpm1
Gli3
Prg2
Milr1
Cd59a
Cr1l
Cd59b
Angpt1
Efna1
Pten
Ngef
Nlgn1
Nlgn3
Il6
Sigirr
Stat6
Il27ra
Fas
Tbc1d10c
Irf4
Pdpk1
Tmbim6
Olfm4
Fcrlb
Traip
Traf3ip1
Atg9a
Mmp28
Pnp
Rag1
Serpinb9
Cd27
Slc46a2
Dock8
Nodal

## Sheet: Proliferation
Selk
Col8a1
Rnf43
Fgf10
Ang4
Cntfr
Pelo
Nf2
Nf1
Serpinf2
Nde1
Kdm5b
Axin2
Flt3l
Col4a3bp
Sos2
Sos1
Sp2
Nog
Drd2
Sp6
Prkd1
Gpx1
Orc3
Klf4
Zap70
Ace
Hes1
Nov
Bcl6
Hes5
Slamf1
Bcl2
Kctd11
Asah2
Isl1
Tacc2
Tacc3
Il12b
Il12a
Alms1
Vhl
Med1
Fgf9
Fgf8
Fgf7
Fgf4
Fgf3
Fgf2
Fgf1
Cebpb
Cebpa
Cd28
Cops2
Sh2d2a
Ascl1
Ift88
Bmp10
Ptprc
Spn
Ell3
Tnfrsf9
Ccnb1
Pim1
Mllt4
Palb2
Smo
Pten
Ppard
Grn
Fto
Yap1
Bcl2l1
Cntf
Bcl2l2
Trim71
Psmb10
Six4
Ercc1
Ercc2
Mbd2
Six1
Six2
Six3
Cdkn1b
Fgfr4
Chek1
Fgfr2
Fgfr3
Wdr77
Fgfr1
Mvp
Stat6
Stat4
Stat3
Prkar1b
Lrrc17
Srpk2
Hnf1b
Klhl41
Stox1
Klk8
Bid
Agt
Lipa
Ints1
Hhex
Fntb
Tbx3
Slc11a1
Plcl2
Sall4
Sall1
Alox12
Cd38
Myd88
Rnf187
Hpse
Mcm7
Hmx2
Lif
Cul4a
Ctgf
Pias1
P2rx7
Bnc1
Sbds
Pnp
Junb
Pthlh
Hif1a
Ros1
Plcd3
H3f3b
H3f3a
Cks2
Tns3
Tead1
Btnl2
Cthrc1
Ngfr
Il7r
Sox18
Tnfsf11
Gins1
E2f3
Gins4
Prpf19
Srrt
Tnfsf18
Csf1r
E2f8
Setd1a
Mitf
Gstp1
Prg4
Braf
Slamf6
Mif
Serpine1
Crip3
Crip2
Kmt2c
Gbx2
F2
Hlx
Gpr183
Nkap
Clcf1
Fbxo4
Nod2
B4galt1
Pdx1
Eif2s2
Fgf20
Fgf21
Cyp7b1
Lyn
Ocstamp
Jarid2
Insm1
Esrp2
Esrp1
Hgf
Figf
Dhps
Tsc22d1
Plag1
Csf1
Csf2
Foxo3
Foxo1
Itgb1
Mmp7
Tyr
Icmt
Mmp14
Mmp16
Cks1b
Cela1
Cfdp1
Tacc1
Nkx2-3
Pla2g4a
Nkx2-6
Nkx2-5
Dnaja3
Pygo2
Birc6
Tnfsf4
Uhrf1
Gli2
Gli3
Gli1
Pgr
Nrk
F2rl1
Rere
Dgcr8
Jag1
Igf1
Mki67
Ghrhr
Tnfaip3
Sdcbp
Ctnnb1
Melk
Mcm10
Cfb
Nr1d1
Anxa1
Irf1
Irf6
Anxa7
Ifng
C330027C09Rik
Sparc
Odc1
Cd244
Nfya
Ovol2
Vsx2
Atf5
Smarca1
Smarca4
Cnot6l
Fshb
Nr4a3
Rhbdd1
Nfkbia
Bax
Ncstn
Bad
Fshr
Shh
Fignl1
Zeb1
Rspo1
Zeb2
Pth1r
Ptgs2
Ptgs1
Cd24a
Dmbt1
Mzb1
Il11ra1
Carm1
Stat5b
Stat5a
Coro1a
Il33
Ssbp3
Cd180
Ncor2
Fubp1
Tgfbr2
Aspm
Ifnb1
Rc3h1
Dll1
Rc3h2
Dll4
Pycard
Kif20b
Hoxb4
Jtb
Dmrt1
Serpinb5
Ifnar2
Eif2ak2
Irs1
Irs2
Bak1
Fkbp1b
Fkbp1a
Fndc3b
Rpgrip1
Tcf19
Nos2
Shc4
Il2ra
Zfp703
Shc1
Cspg4
Dazap1
Impdh1
Tbx2
Tbx18
Hoxa5
Tbx1
Hoxa3
Tbx5
Hdac5
Egf
Tlx1
Pou3f3
Dbh
Samd9l
Nanog
Sirt6
Sox10
Sox11
Sox15
Sox17
Cnbp
Gmnc
Iqgap3
Dixdc1
Myog
Ebi3
Txnrd1
Pdgfa
Pdgfb
Pdgfc
Nodal
Cd276
Pdpn
Ptprz1
Disc1
Pura
Pold4
Prdx1
Htr2b
Hcls1
Gfap
Prl2c3
Prl2c2
Hdac2
Lrp6
Traf6
Lrp5
Notch1
Notch2
Notch3
Tmem119
Nkx3-1
Ndel1
Otp
Hhip
Dagla
Daglb
Rasgrf1
Rarg
Kdm1a
Btrc
Bmi1
Kalrn
Pax7
Pax6
Pax1
Map7
Pax3
Wnt5a
Lrp2
Blm
Cd1d1
Lin28a
Spink2
Agap2
Btc
Hmgb2
Tfap2c
Ikzf3
Numbl
Rara
Tcf7
Ctf2
Mab21l1
Mab21l2
Rag2
Lexm
Rarb
Fadd
Igf2bp1
Ecd
Cnn2
Syk
Cep120
Foxg1
Hmga2
Emx1
Lgi4
Cd151
Fgf18
Fgf13
Cdh2
Fgf17
Rad51b
Havcr2
Mycn
Gpam
Frs2
Bmpr1a
Cdon
Brca2
Vpreb1
Vpreb2
Lmx1b
Nckap1l
Col18a1
Uchl1
Mecp2
Rap1b
Tex19.1
Ripk3
Ripk2
Satb1
Foxn1
Tnfsf13b
Trnp1
Slc39a10
Peli1
Prdx2
Uncx
Ntn1
Cxcl1
Azi2
Ncapg2
Pak1ip1
Prdm1
Tnfrsf4
Reg3g
Tgif1
Reg3a
Mapk14
Esr2
Krtap21-1
Esr1
Ddr2
Card11
Fyn
Zpr1
Ptger2
Dach1
Gng2
Rhoa
Hpse2
Gnai2
Fzr1
Itgam
Recql4
Ptk2
Gcnt2
Megf10
Kif14
Fbrs
Sox8
Sox9
Sox2
Dct
Sox4
Erbb4
Xrcc5
Hras
Egfr
Fa2h
Impdh2
Bcl11b
Dppa2
Hipk2
Hipk1
Pcnt
Gas1
Tbx19
Gata1
Mafg
Areg
Rac2
Rbpj
Deaf1
Ncf1
Gsk3b
Hprt
Fosl2
Foxc2
Foxc1
Angptl8
Itgax
Rsu1
Tnfsf9
Itgav
Lig4
Xrcc4
Gng5
Itgal
Mapk11
Il27
Gnat1
Grpr
Gata4
Itgad
Kcna1
Ctsh
Brk1
Ccl5
Tcf7l2
Ppp1r8
Sart3
Zmiz1
Ephb6
Hmgn1
Calcrl
Naa35
Lta
Cul1
Cdk1
Ihh
Cdk4
Tlr4
Prkx
Eya1
Apoa1
Kras
Nppc
Prok1
Mst1
Ccnd1
Ccnd3
Gdf2
Apobec1
Ezh2
Bop1
Dhcr7
Mdm4
Gata6
Smad4
Pik3cb
Jun
Mecom
Plau
Smad3
Hbegf
Nr2e1
Foxm1
Nr5a2
Tnf
Mov10l1
Wnt10b
Sfrp2
Neurod4
Esrrb
Tbx20
Sulf2
Tff2
Phip
Prrx1
Flt4
Prrx2
Flt3
Lama5
Pdgfrb
Tbk1
Cd248
S1pr1
Sidt2
Spta1
Cib1
Mydgf
Prkar1a
Fgfbp1
Dusp22
Sash3
Kdr
Ufl1
Marcksl1
Znhit1
Mre11a
Hsf4
Znrf3
Sat1
Il11
Gnb1
Il15
Il6
Igfbp3
Il4
Il2
Il3
Igfbp4
Igfbp5
Rps6ka1
Lrg1
Npm1
Dchs1
Rnaseh2b
Twist1
Twist2
Ptk2b
Ctc1
Arhgap5
Agtr1a
Tgfbr3
Acvr2a
Ticam1
Trp53
Fbxl7
Nras
Ilk
Ctnna1
Rps6
Fst
Foxf1
Brd4
Zbtb32
Hdac1
Myh10
Sphk2
Sphk1
Birc5
Atxn1l
Sema5a
Dmrta2
Ccdc88a
Ccdc88b
Tfap2b
Shb
Nrarp
Gapt
Dlx5
Dlx6
Pafah1b1
Cdc42
Chst11
Npr3
Tal1
Emx2
Psen1
Acsl6
Tial1
Kit
Clec2i
Dph1
Itgb3
Itgb2
Topors
Fap
Map2k1
Gak
Numb
Msx1
Pbx1
Wapl
Mta3
Lgr5
Lgr4
Col8a2
Atad5
Zp3
Hoxd13
Mapk1
T
Cxcr4
Abl1
Pin1
Cav2
Tnfrsf13c
Atxn1
Fzd3
Dicer1
Shcbp1
Fzd6
Tirap
Arx
Fzd9
Scarb1
Eml1
Kitl
Kat2a
Ptges3
Sepn1
Shox2
Hand2
Myc
Cxcl12
Cd3e
1110001J03Rik
Plac8
Rogdi
Osr1
Osr2
Rltpr
Runx2
Runx1
Ifltd1
Hey2
Atoh8
Foxp2
Foxp3
Foxp1
Tnfrsf1b
Lhx5
Lhx9
Rpa1
Rpa3
Il7
Met
Lifr
Pdcd1lg2
Setdb1
Ptpn22
Ift20
Cd81
Cd80
Cdkn1a
Cd86
Ceacam1
Taf4b
Oca2
Tert
Wnt7a
Elf4
Wnt7b
Mpl
Pth
Wnt2
Wnt1
Wnt4
Vtcn1
Scx
Plcd1
Psmg1
Entpd5
Chrnb2
Smad1
Ambn
Gpc3
Vegfa
Ereg
Vegfc
Ada
Ptbp2
Lef1
Adm
Fbxw4
Trp63
Tgfb1
Efnb1
Zfp335
Bbs1
Lmo1
Epha2
Foxe3
Gadd45gip1
Amelx
Suz12
Gkn1
Pitx2
Cd79a
Pou1f1
Ncoa3
Klb
Amica1
Rtkn2
Fzd5
Ccr2
Ccr3
Tnc
Xbp1
Paxbp1
Aldh1a2
Dlg1
Tek
Epgn
Ankrd2
Rrn3
Wdr48
St8sia1
Fabp7
Itpkb
Nbn
Adgrg1
Pml
Gucy2c
Egln3
Tnfsf13
Mef2c
Acvrl1
Skor2
Bglap2
Id4
Id2
Nasp
Cd40
Polr3g
E2f4
Myocd
Icosl
Plxnb2
Tpd52
Wash1
Chuk
Taf8
Map2k2
Xcl1
Tenm4
Edn1
Edn3
Hey1
Kif3a
Tgfa
Gpr37l1
Bysl
Il23a
Lhx1
Park7
Dnmt1
Prkcd
Zfp503
Rora
Prkcq
Ptch1
Malt1
Zfp36l1
Bmp7
Bmp6
Bmp4
Rpl29
Bmp2
Wnt3a
Larp7
Zfpm2
Rxra
Rxrb
Il6st
Cflar
Mtss1
Tdgf1
Fanca
Fat4
Fancl
Prox1
Morf4l1
Ghrh

## Sheet: Chemotaxis
Plekhg5
Ano6
Pdgfb
Ccl12
Itgb2
Ccl17
Ifng
Lsp1
Spp1
Ffar2
Cx3cr1
Rarres2
Pdgfra
Thbs1
Cxcr2
Cxcr5
Trpm4
Lyst
Lbp
Cnr2
Tirap
C3ar1
Scrib
Trem1
Trem3
Defb14
Pik3c2g
Cxcl13
Cxcl12
Cxcl15
Ptprj
Cxcl16
Rac2
Rac1
Lgals9
C5ar1
Cx3cl1
Ear2
Artn
Prex1
Met
Itgam
Cysltr1
Ccl2
Ccl3
Ccl1
Camk1d
Ccl5
Arhgef5
Nup85
Pde4b
Pde4d
Rab13
Amot
Itga9
Itga1
Ager
Cxcl14
Vav1
Ptk2b
Tmem102
Fcgr3
Vav3
Cxcl3
Ccr10
Adam8
Tymp
Coro1a
Fer
Myo9b
Retnlg
Cd74
Ptgdr2
Xcr1
Mst1
Parva
Slc37a4
Tnfsf14
Tnfsf18
Saa3
Ccr1
Ccr2
Ccr3
Ccr4
Ccl27a
Ccr7
Ccr8
Ccr9
Pdgfrb
Fcer1g
S1pr1
Gpr183
Nod2
Swap70
Ccl25
Ccl24
Fpr1
Fpr3
Il16
Tsc2
Nrp1
Il17ra
Il17rc
Kit
Mtus1
Xcl1
Csf3r
Fgf10
Il23a
Prkca
Ccl21a
Vegfa
Trpv4
Il1b
Gpsm3
Nckap1l
Sema5a
Rpl13a
Mpp1
Adgra2
S100a9
F2rl1

## Sheet: Apoptosis
Cyp1b1
Ppp2r1a
Nf1
Atpif1
Csrnp3
Gpx1
Ngfr
Xpa
Bcl2
Faf1
Inca1
Tigar
Akt1
Syce3
Fgf8
Fgf4
Cebpb
Cd28
Unc5c
Ascl1
Ptprc
Spn
Nfatc4
Zfp385a
Tyro3
Pim2
Dab2ip
Pten
Fasl
Gabrb2
Gabrb3
Bcl2l1
Brca2
Ercc6
Six3
Zswim2
Xrcc2
Spink2
Fgfr1
Madd
Tfap4
Map3k1
Pdcd6ip
Map3k5
Abca7
Wwox
Agt
Parp2
Apopt1
Tmem109
Bok
Jag2
Eef1a2
Ntf3
Bnip3l
Il19
Tex261
P2rx1
P2rx7
Bnc2
Mknk2
Pnp
Mknk1
Dffa
Hif1a
Ier3
Nlrc4
Eda2r
Tnfsf10
E2f2
E2f1
Dbh
Zfp819
Il33
Mcl1
Cideb
Trp73
Cidea
B4galt1
Topors
Ddx20
Tsc22d1
Trim35
Foxo3
Mmp9
Jmjd6
Endog
Uaca
Rln1
Nkx2-5
Nox1
Spi1
Vhl
Serinc3
Gli3
Ngf
Igf1
Ano6
Msh6
Ctnnb1
Melk
Anxa1
Marco
Anxa6
Ifng
Lsp1
Ei24
Ifnz
Atf4
Cd248
Tm2d1
Herpud1
Zbtb16
Gzmb
Nr4a3
Nr4a1
Bax
Bad
Umodl1
Shh
Ing5
Sgpp1
Ddit3
Inpp5d
Cd24a
Usp53
Cryaa
Skil
Plagl2
Mael
Thra
Perp
Pias4
Jtb
Musk
Becn1
Hic1
Eif2ak3
Arf6
Bak1
Mbd4
Nol3
Shc4
Sav1
Tbx1
Pdcd6
Pdcd7
Bbc3
Dido1
Pdcd1
Sirt2
Sirt1
Ppp1ca
App
Dnase1l3
Pxt1
Apc
Krt18
Adora2a
Trps1
Rb1
Gpr65
Apaf1
Ticam1
Lrp1
Bmf
Lrp5
Pdia3
Notch1
Notch2
Pink1
Itpr1
Rarb
Pmaip1
Rarg
Dnaja3
Itm2c
Itm2b
Taf10
Gimap8
Pik3r1
Pax2
Wnt5a
Pax8
Ing4
Gsdma3
Sarm1
Cul3
Rbck1
Erp29
Hmox1
Mef2c
Vdr
Fadd
Bcl2l11
Krt8
Dapk3
Dapk1
Pgap2
Mfge8
Adam17
Cdh1
Dedd
Hyal2
Atm
Wt1
Frs2
Bmpr1b
Akt1s1
Lrp6
Siglec1
Col18a1
Ripk1
Ripk3
Ripk2
Pawr
Eif5a
Shisa5
Ncoa1
Ngfrap1
Apbb2
Oxr1
Snca
Tnfrsf4
Chek2
Chek1
Pcsk9
Esr2
Bik
Esr1
Bid
Zpr1
Tcp1
Rbm10
Rnf7
Steap3
Msh2
Bub1
Pidd1
Kif14
Dap3
Ctnna1
Erbb4
Xiap
Hras
Slc25a4
Hipk2
Hipk1
Wnt11
Gas6
Fnip1
Fnip2
Rac1
Xbp1
Gsk3a
AY074887
Gsk3b
Grin1
Il20ra
Bcl2l2
Ryr2
Itgav
Lig4
Tnfrsf21
Grin2a
Il24
Gata3
Srpk2
Ccl2
Ccl3
Camk1d
Tcf7l2
Srpx
Traf3ip2
Axl
Cul1
Trp53inp1
Cdk5
Pea15a
Kcnip3
Bnip3
Cryab
Adam8
Prkdc
Mlh1
Aatk
Eef1e1
Alx3
Alx4
Casp12
Sfrp2
Neurod1
Fam162a
Pear1
Sh3glb1
Ntrk3
Tgfb3
Vcp
Ptpn2
Htra2
Il18
Casp7
Casp2
Casp3
Casp8
Casp9
Il6
Il4
Il2
Il3
Ppif
Tnfrsf12a
Alox15
Ubd
Cd5
Zc3h12a
Agtr1a
Tgfbr2
Plekhf1
Trp53
Inhbb
Topaz1
Men1
Rassf6
Il1a
Il1b
Nck1
Zfp346
Bdnf
Eya2
Faim2
Daxx
Mtch2
Psen2
Psen1
Megf10
Abl1
Hnrnpk
Sp110
Tmbim6
Ctsh
Flcn
Grid2
Spop
Fas
Fap
Ctsc
Cd36
Pigt
Diablo
Msx1
Msx2
Nr3c1
Cyr61
Nlrp3
Mgmt
Fgf13
Mertk
Gabra5
Ddit4
Mapk8
Mapk9
Dicer1
Fzd5
Plscr1
Zfp110
Maged1
Casp8ap2
Ppp2cb
Kitl
Agrn
Hand2
Myc
Prkra
Cd3e
Pkn1
Clca3a2
Camk2a
Camk2b
Zfp36l1
Runx3
Trim2
Bcl10
Rps6ka2
Tnfrsf1b
Tnfrsf1a
Xkr8
Polb
Cdkn1a
Epo
Stk3
Stk4
Lyn
Wnt7b
Etv6
Hk2
Rad9a
Egr1
Tradd
Scn2a1
Osm
Stat1
Sod2
Rock2
Pycard
Lef1
Trp63
Fbxw7
Tgfb2
Jmy
Epha7
Cyct
Nupr1
Cycs
Bag3
Bag1
Bag6
Bcl2l10
Gclc
Tnf
Aifm1
Aldh1a1
Aldh1a2
Aldh1a3
Ankrd2
Ins2
Htt
Nbn
Ndufa13
Pml
Ern2
Ern1
Egln3
Ero1l
Cdkn2a
Tnfsf12
Sfrp1
Wnt3a
Khdc1b
Nck2
Atg3
Lcn2
Nfkbid
Rapsn
Fgfr3
Map2k7
Map2k4
Mal
Degs1
Ido1
Prkca
Park7
Prkcd
Park2
Gclm
Capn10
Cradd
Trpv2
Bmp7
Pou4f1
Pou4f3
Jak2
Jak3
Rapgef2
Sharpin

## Sheet: Cytokine Receptor
Csf3r
Csf2ra
Csf1r
Lifr
Ifnar2
Ifngr1
Il1r1
Il2ra
Il2rb
Il2rg
Il3ra
Il4ra
Il5ra
Il6ra
Il6st
Il7r
Crlf2
Il9r
Il10ra
Il10rb
Il12rb1
Il12rb2
Il13ra2
Il15ra
Il17ra
Il18r1
Il18rap
Il18bp
Il20ra
Il21r
Il22ra1
Il23r
Il17re
Il27ra
Ifnlr1
Il31ra
Il1rl1
Il1rap
Il1rl2
